# Supplementary material
Source: PubMed Central journal article supplement (PMC7314235)
Supplement: NIHMS1589650-supplement-Supporting_Information.pdf [file NIHMS1589650-supplement-Supporting_Information.pdf]

LPG as a Clean Cooking Fuel: Adoption, Use, and Impact in Rural  
India

**Supporting Information**

Carlos F. Gould  
Columbia University

Johannes Urpelainen\*  
Johns Hopkins SAIS

February 12, 2018

**Contents**

**A1 Survey Data**

**APP-2**

**A2 Supplemental Results**

**APP-4**

---

\*Corresponding author.

# A1 Survey Data

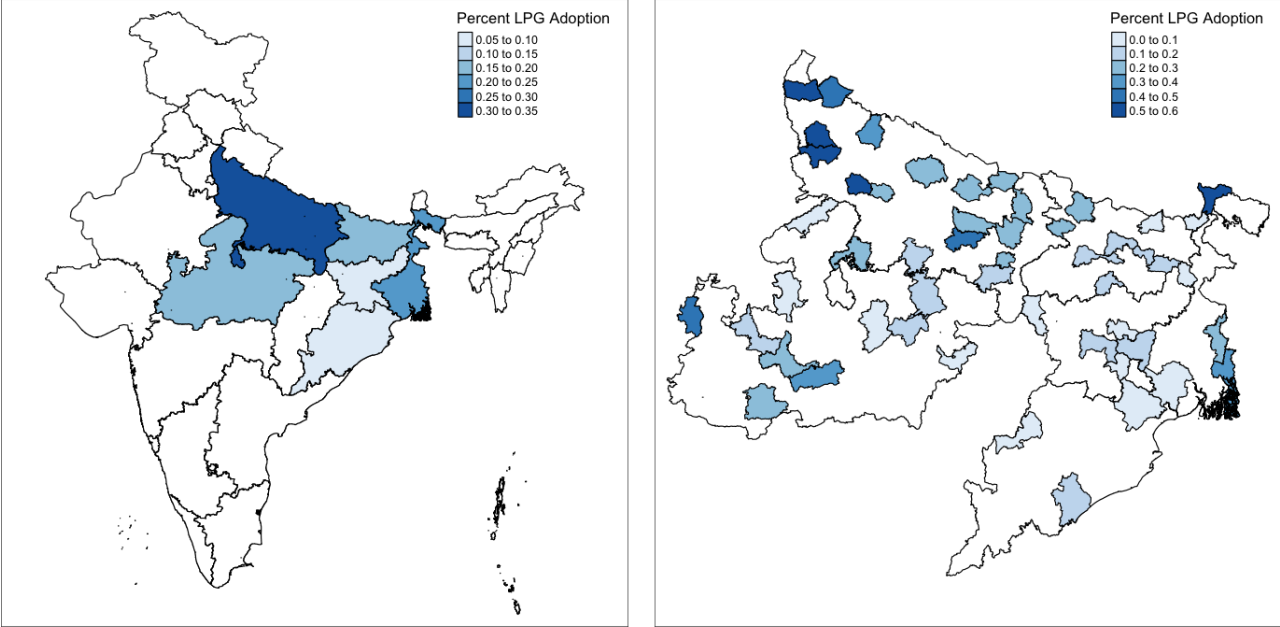

Figure A1: Map showing percent LPG adoption in study states (left) and districts (right). White spaces are outside the study area.

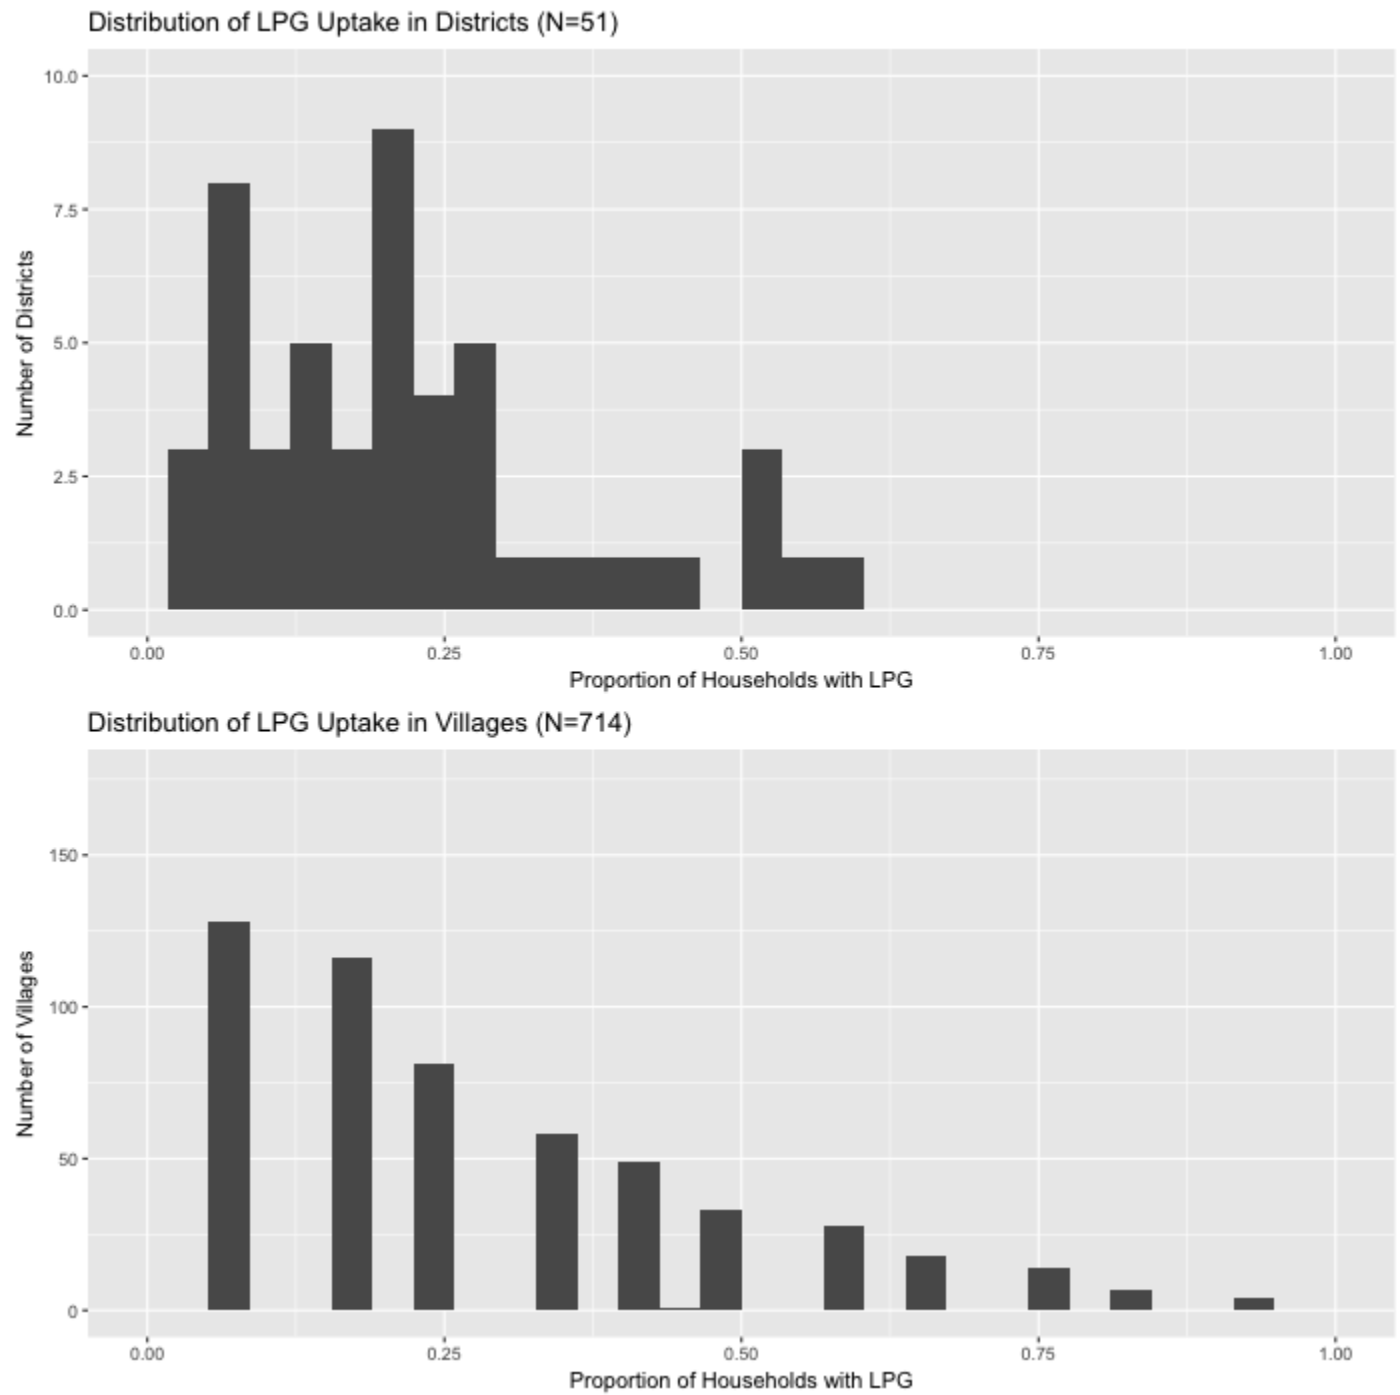

Figure A2: Histogram showing the distribution of LPG uptake in study districts and villages.

## A2 Supplemental Results

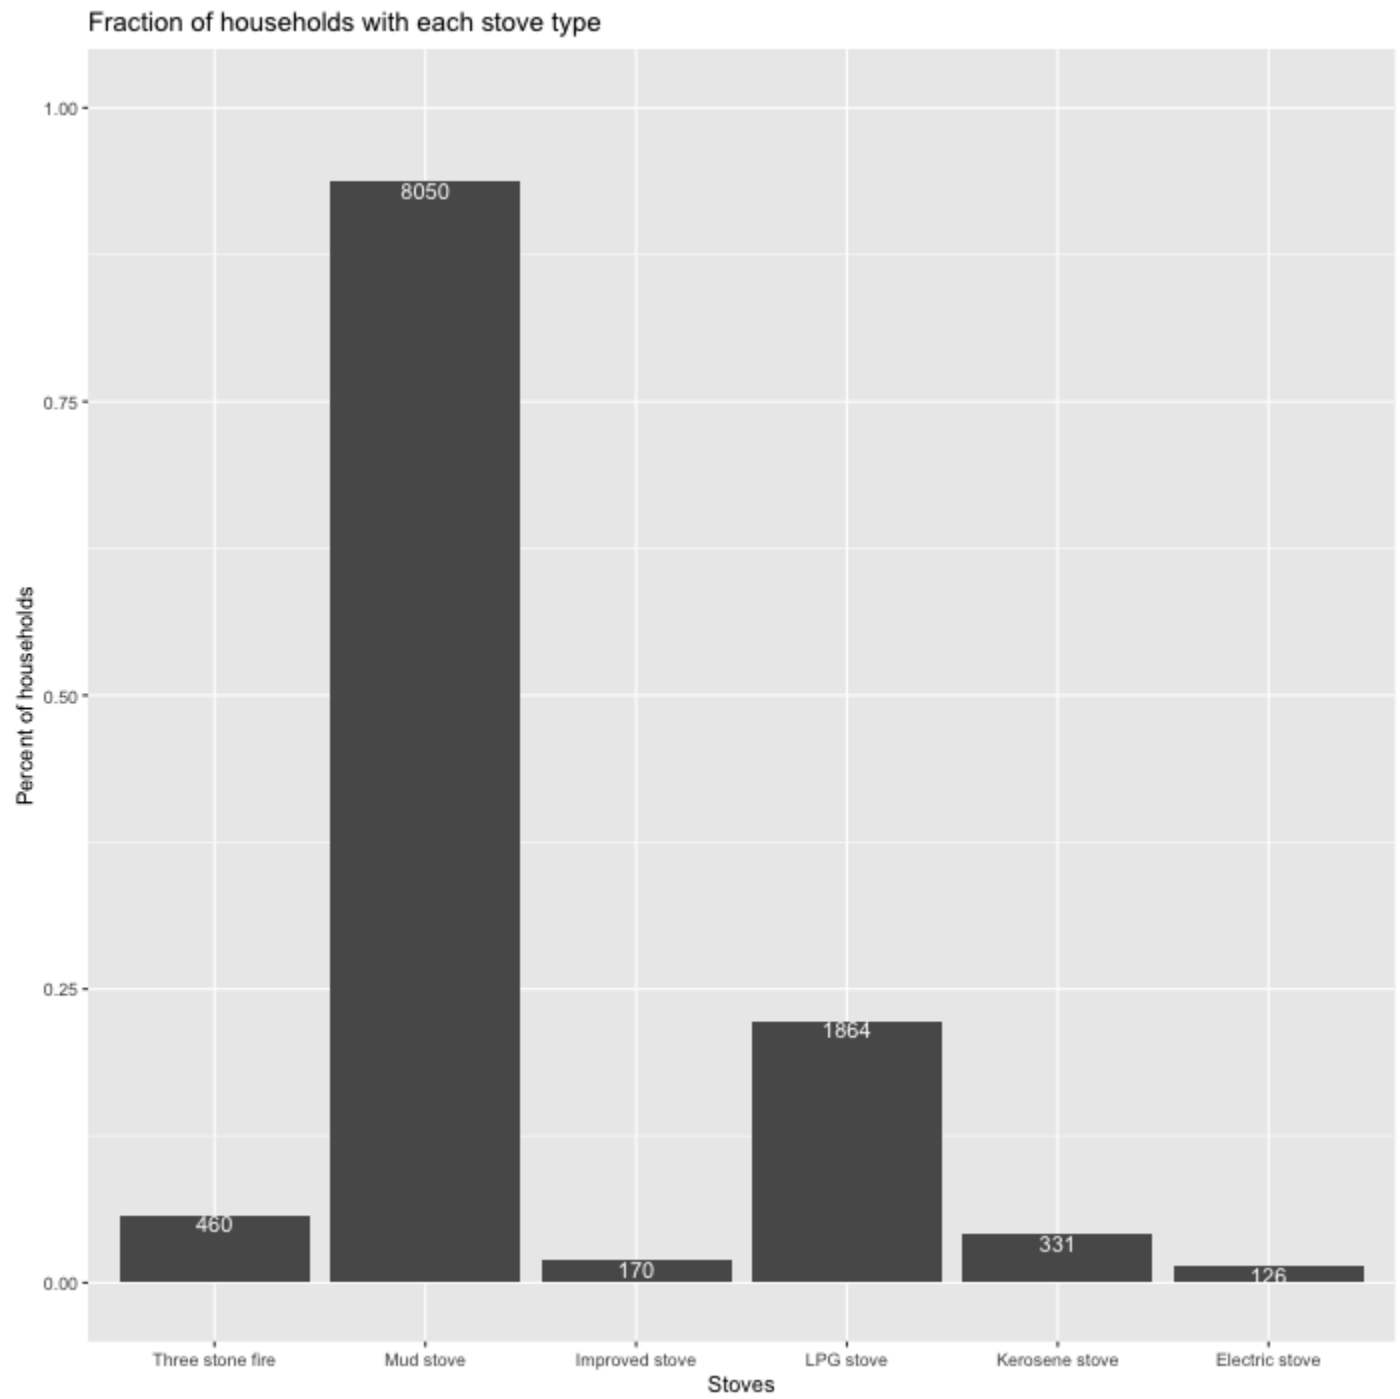

Figure A3: Figure showing the presence of all stove types in households.

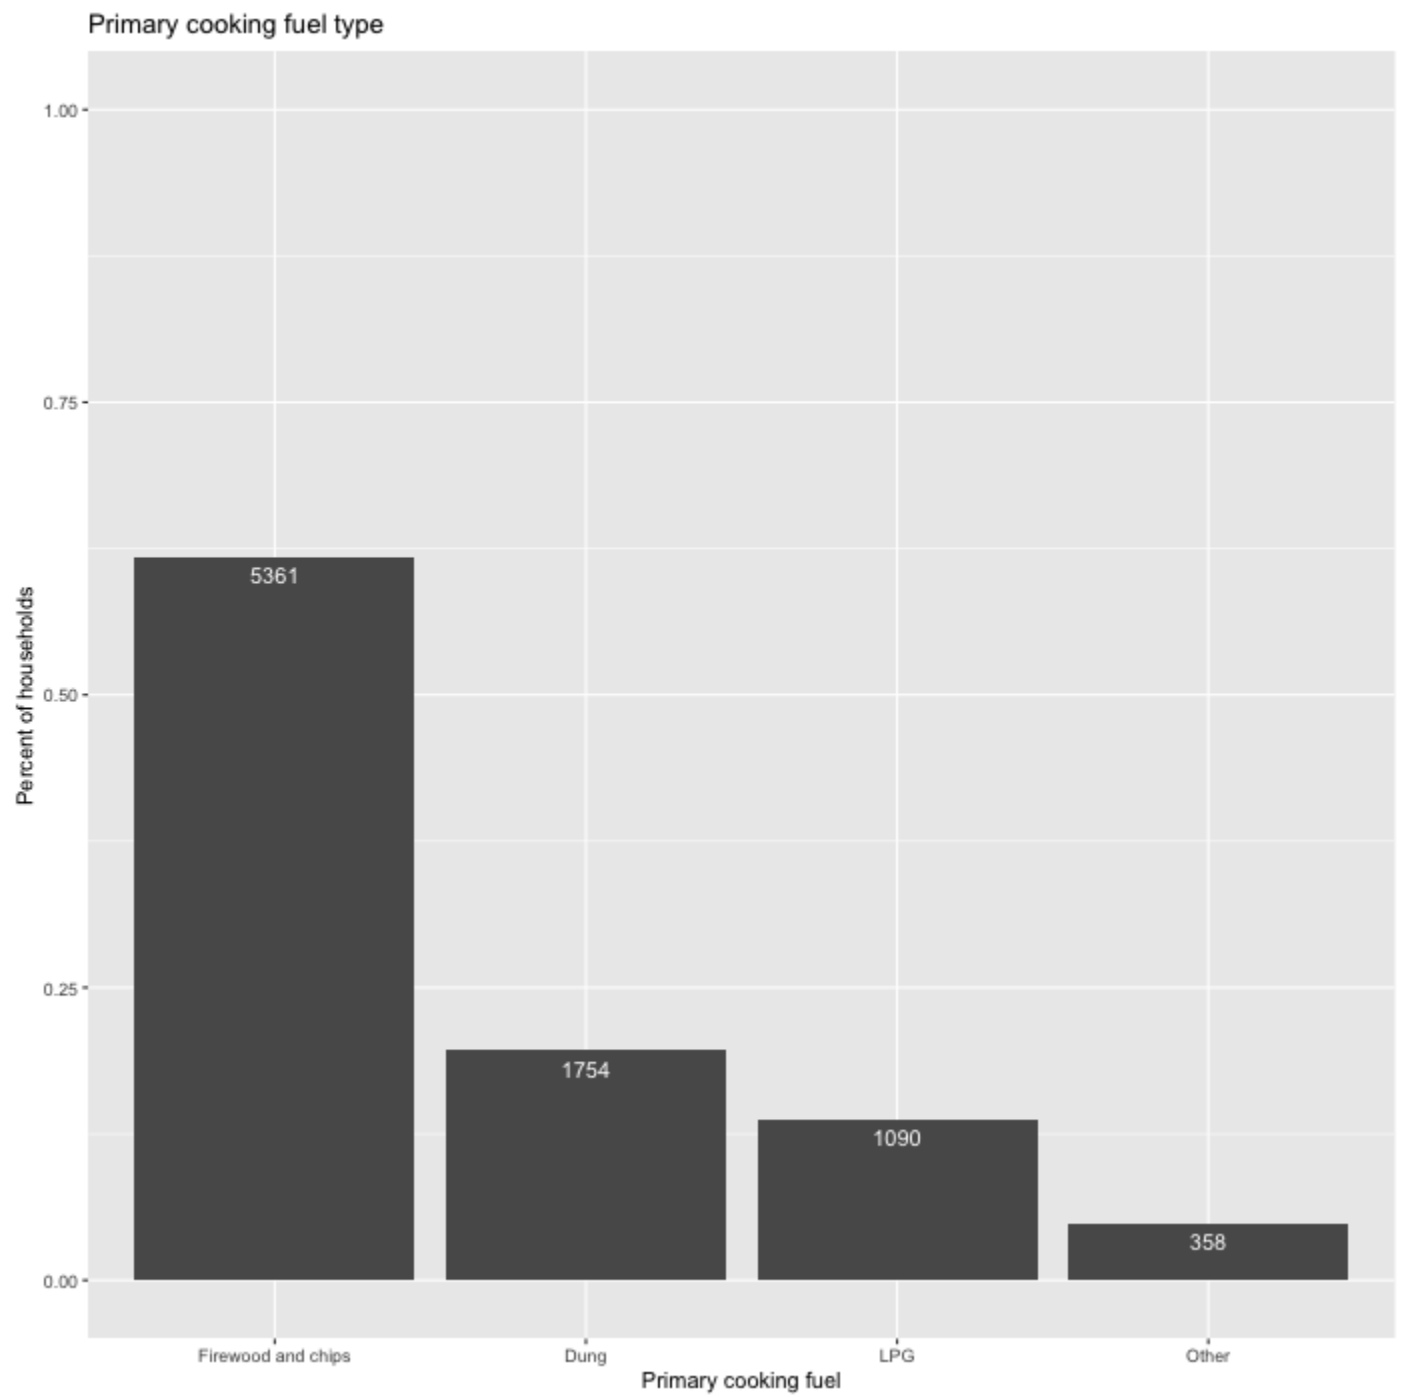

Figure A4: Figure showing the distribution of reported primary cooking fuel.

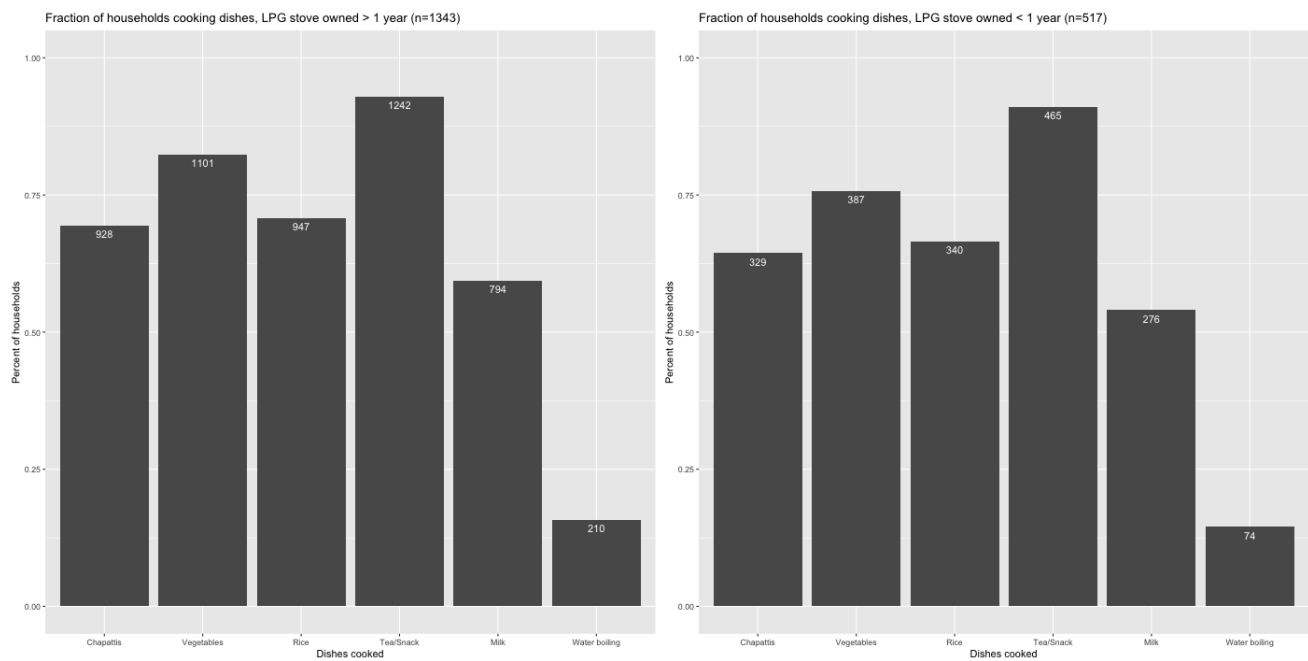

Figure A5: Barplot showing the percent of dishes cooked in households that have had LPG for more than one year (*left*) and less than one year (*right*).

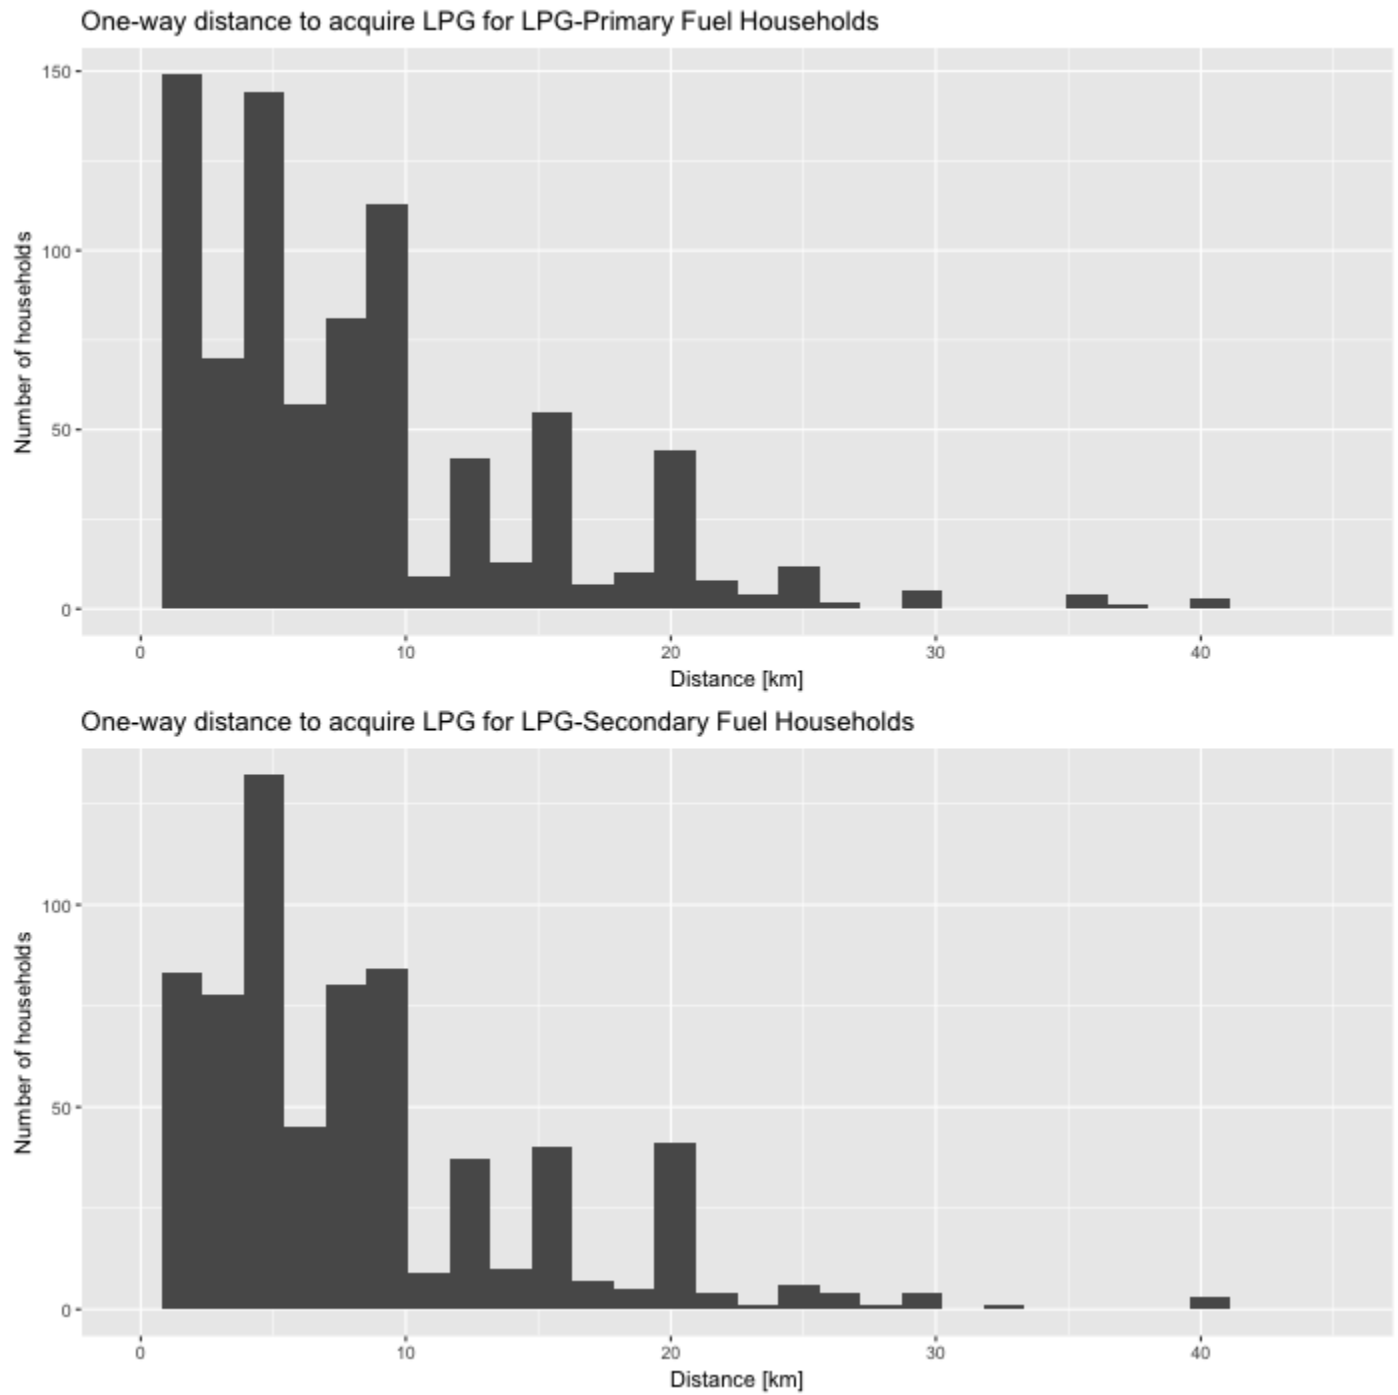

Figure A6: Barplot showing the one-way distance traveled to acquire LPG cylinders in households using LPG as a primary fuel (*upper*) and as a secondary fuel (*lower*).
